# Supplementary material for: Spectroscopic study of TPPS4 nanostructures in the presence of bovine serum albumin
Source: Royal Society of Chemistry journal article supplement (doi:10.1039/b513464a), 2006-01-26
Supplement: b513464a.pdf [file b513464a.pdf]

## Supplementary data

Fresh TPPS<sub>4</sub> and TPPS<sub>4</sub>-BSA solutions (2  $\mu$ M) were prepared using the same procedure as described in the manuscript (Materials and Methods section). Between the measurements, the sealed samples were kept in the dark at 23°C. Three TPPS<sub>4</sub>:BSA molar ratios (1:0.01; 1:1, 1:10) corresponding to the three stages of J-aggregates formation, which were specified and discussed in the manuscript (Figs. 6, 7), were chosen for this experiment.

Changes in absorption spectra of TPPS<sub>4</sub> and TPPS<sub>4</sub>-BSA solutions occurring at 300 min after preparation can be seen in Fig. 1 (see below) in comparison with the spectra detected at 10 min (presented in the manuscript). All absorption spectra measured after 10, 120 and 300 minutes for pure TPPS<sub>4</sub> solution and each of TPPS<sub>4</sub>-BSA mixed solutions are shown separately in Fig. 2.

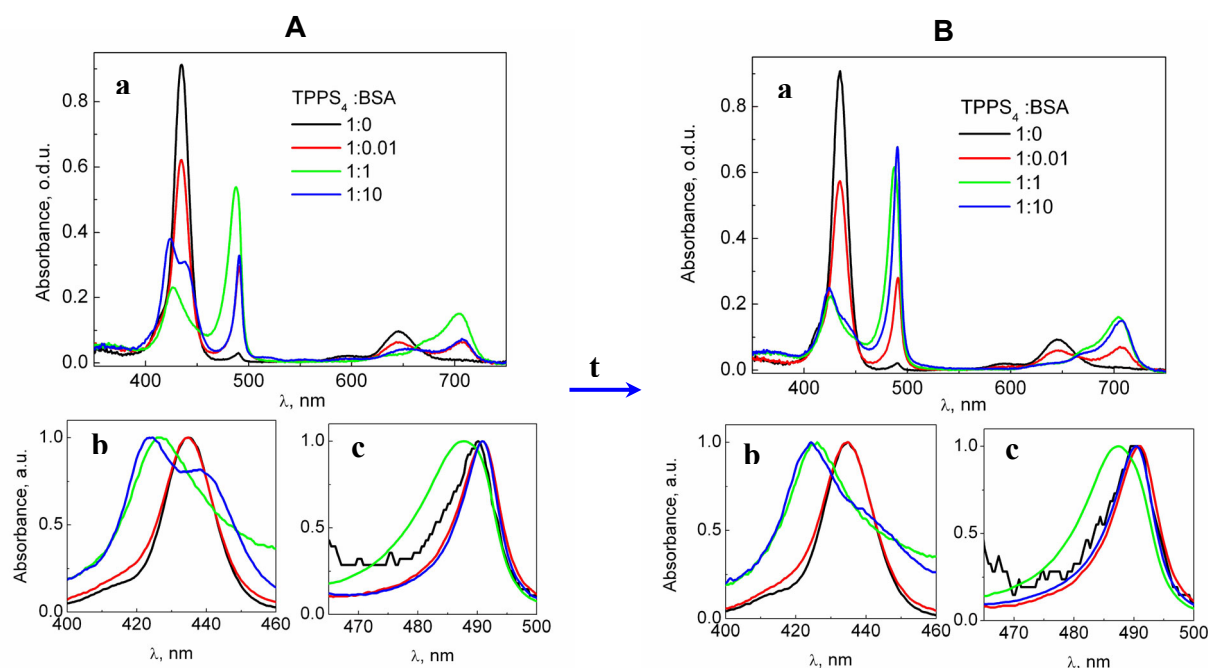

Fig. 1. Absorption spectra of TPPS<sub>4</sub> (2  $\mu$ M) and TPPS<sub>4</sub>-BSA solutions measured after 10 (A) and 300 (B) minutes: (a)- original, (b, c)- normalized at the maxima of the Soret and J-band, respectively.

During five hours, only minor absorption changes were observed in the spectra of the pure TPPS<sub>4</sub> solution (Fig. 2A) and in the presence of low and intermediate BSA concentrations (Fig. 2 B,C). Consequently, the parameters of an excitonic band of J-aggregates given in the manuscript Fig. 6 for stages I and II change in time only insignificantly (Fig. 1A(c), 1B(c)). However, in the presence of high BSA concentration (stage III), slow formation of J-aggregates from two monomeric TPPS<sub>4</sub> species being initially bound to protein molecules (as reflected by decreasing absorption bands at 423 nm and 440 nm) still took place even at five hours after preparation (Fig. 2D). Although the intensity of the J-aggregates' absorption band increased in time, its bandwidth and spectral position (at 490 nm) remained almost unchanged (Fig. 1A(c), 1B(c)). Thus, the presence of high concentration of BSA does not destroy the J-aggregates in time, the spectral properties of which also differ from those (of the J-aggregate absorption band) observed at the intermediate BSA concentration.

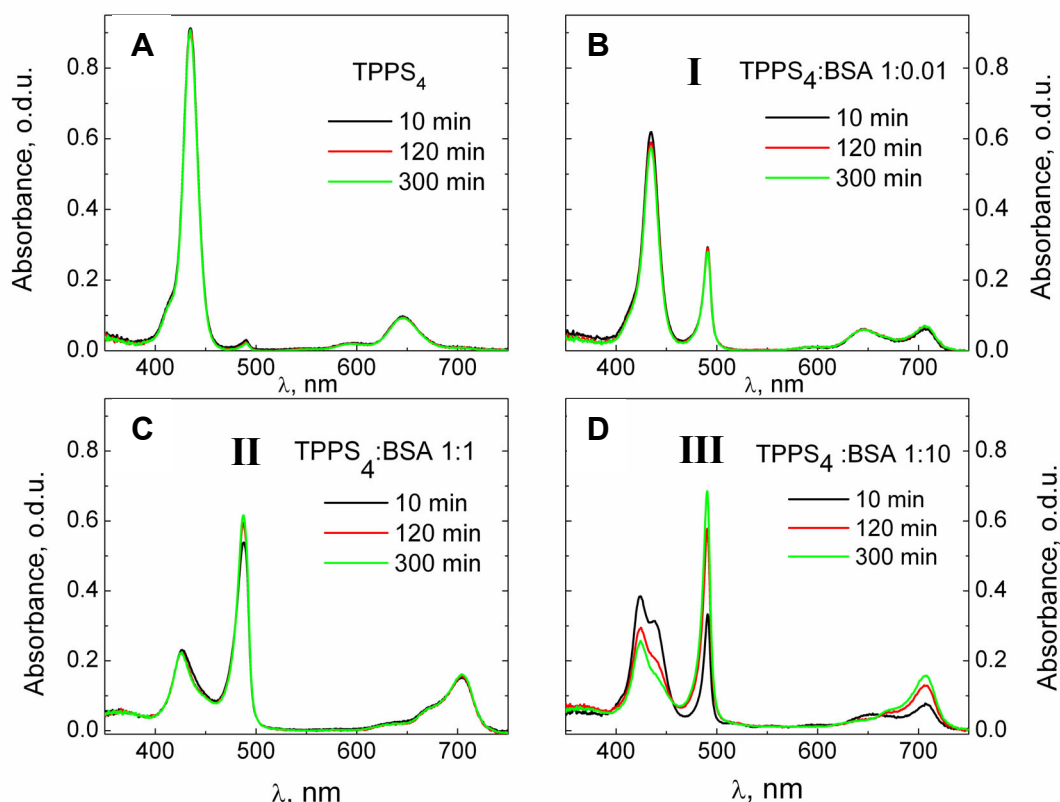

Fig. 2. Absorption spectra of TPPS<sub>4</sub> (A) and TPPS<sub>4</sub>-BSA (B-1:0.01; C-1:1; D-1:10) solutions measured after 10, 120 and 300 minutes. Roman numerals indicate different J-aggregates formation stages at corresponding representative TPPS<sub>4</sub>-BSA molar ratios.

In conclusion, the presence of different BSA amounts determines the specificity of interaction pattern between TPPS<sub>4</sub> and BSA in acid medium; consequently, the predominant type of J-aggregates in each stage could not be converted into another type by equilibrating the system.
